# Supplementary material
Source: MDPI journal article supplement (https://www.mdpi.com/2076-3417/11/1/78)

# An in vitro evaluation of the biocidal effect of oregano and cloves' volatile compounds against microorganisms colonizing an oil painting—A pioneer study

Lucrezia Gatti, Federica Troiano, Violetta Vacchini, Francesca Cappitelli and Annalisa Balloi

**Table S1.** Inhibition scale degree. Examples of contactless test representing different inhibition halo values: [+] for medium inhibition (approximately one third of the petri dish), [++] for high inhibition (approximately the half of the petri dish) and [+++] for total inhibition.

| [ + ]                                                                             | [ ++ ]                                                                            | [ +++ ]                                                                            |
|-----------------------------------------------------------------------------------|-----------------------------------------------------------------------------------|------------------------------------------------------------------------------------|
|  |  |  |

**Table S2.** Clusterization of bacterial isolates according to their morphology.

| <b>Bacterial Cluster</b> | <b>Morphological Description</b>                                                                                              |
|--------------------------|-------------------------------------------------------------------------------------------------------------------------------|
| <b>Cluster I</b>         | white color, wavy edges, irregular shape, flat relief, smooth and translucent surface, mucous texture                         |
| <b>Cluster II</b>        | white-yellow color, wavy edges, circular shape, raised relief, smooth and translucent surface, mucous consistency             |
| <b>Cluster III</b>       | white color, whole edges, circular shape, raised relief, smooth and translucent surface, mucous consistency                   |
| <b>Cluster IV</b>        | white color, whole edges, circular shape, flat relief, smooth and translucent surface, mucous consistency                     |
| <b>Cluster V</b>         | white color with brown center, whole edges, circular shape, raised relief, smooth and translucent surface, mucous consistency |
| <b>Cluster VI</b>        | black color, whole edges, circular shape, raised relief, smooth and matt surface, creamy texture                              |
| <b>Cluster VII</b>       | yellow color, whole edges, irregular shape, flat relief, smooth and translucent surface, mucous consistency                   |
| <b>Cluster VIII</b>      | white color, whole edges, circular shape, raised relief, smooth and translucent surface, creamy consistency                   |
| <b>Cluster IX</b>        | white color, whole edges, irregular shape, flat relief, smooth and opaque surface, mucous consistency                         |
| <b>Cluster X</b>         | white color, whole edges, circular shape, raised relief, smooth and translucent surface, creamy consistency                   |
| <b>Cluster XI</b>        | white color, whole edges, irregular shape, flat relief, smooth and translucent surface, mucous consistency                    |
| <b>Cluster XII</b>       | white opaque color, whole edges, irregular shape, flat relief, smooth surface, mucous consistency                             |
| <b>Cluster XIII</b>      | cream color, whole edges, circular shape, flat relief, smooth and translucent surface, mucous consistency                     |

Table S3. Clusterization of fungi isolates according to their morphology.

| Fungal Cluster | Morphology                                                                          | Morphological Description                                                                   |
|----------------|-------------------------------------------------------------------------------------|---------------------------------------------------------------------------------------------|
| Cluster I      | 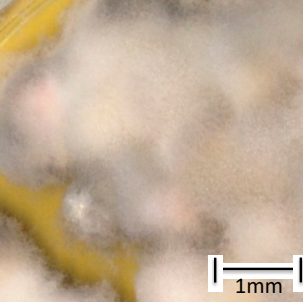   | white color, filamentous edge, rhizoidal shape, rough and opaque surface, dusty consistency |
| Cluster II     |    | white color, filamentous edge, rhizoidal shape, rough and opaque surface, dusty consistency |
| Cluster III    |   | brown color, filamentous edge, rhizoidal shape, rough and opaque surface, dusty consistency |
| Cluster IV     |  | white color, filamentous edge, rhizoidal shape, rough and opaque surface, dusty consistency |
| Cluster V      |  | white-brown color, lobed edge, rhizoidal shape, rough and opaque surface, dusty texture     |

|                     |                                                                                     |                                                                                                        |
|---------------------|-------------------------------------------------------------------------------------|--------------------------------------------------------------------------------------------------------|
| <b>Cluster VI</b>   |    | yellow color, curled edge, irregular shape, rough and dull surface, dusty texture                      |
| <b>Cluster VII</b>  |    | brown color, lobed edge, rhizoidal shape, rough and opaque surface, dusty texture                      |
| <b>Cluster VIII</b> |   | white color and darker center, full edge, circular shape, rough and opaque surface, creamy consistency |
| <b>Cluster IX</b>   |  | white color, filamentous edge, filamentous shape, rough and opaque surface, dusty texture              |
| <b>Cluster X</b>    |  | brown color, lobed edge, rhizoidal shape, rough and opaque surface, dusty texture                      |
| <b>Cluster XI</b>   |  | white color, lobed edge, rhizoidal shape, rough and opaque surface, dusty texture                      |

|                     |                                                                                     |                                                                                                      |
|---------------------|-------------------------------------------------------------------------------------|------------------------------------------------------------------------------------------------------|
| <b>Cluster XII</b>  |    | brown-black color, filamentous edge, rhizoidal shape, rough and opaque surface, dusty texture        |
| <b>Cluster XIII</b> |    | white-yellow color, lobed edge, rhizoidal shape, rigid and opaque surface, dusty consistency         |
| <b>Cluster XIV</b>  |   | black color, wavy edge, irregular shape, rough and matte surface, dusty texture                      |
| <b>Cluster XV</b>   |  | white-yellow color, curled edge, irregular shape, rough and opaque surface, powdery texture          |
| <b>Cluster XVI</b>  |  | white color, filamentous edge, filamentous shape, rough and opaque surface, dusty texture            |
| <b>Cluster XVII</b> |  | brown color and white border, lobed border, rhizoidal shape, rough and opaque surface, dusty texture |

|                      |                                                                                     |                                                                                                    |
|----------------------|-------------------------------------------------------------------------------------|----------------------------------------------------------------------------------------------------|
| <b>Cluster XVIII</b> | 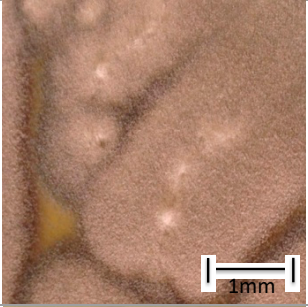   | brown color, opaque, eroded edge, irregular shape, rough and dull surface, dusty texture           |
| <b>Cluster XIX</b>   |    | white color, odulated edge, circular shape, rough and opaque surface, dusty texture                |
| <b>Cluster XX</b>    |   | white and gray color, filamentous edge, filamentous shape, rough and opaque surface, dusty texture |
| <b>Cluster XXI</b>   |  | brown color, filamentous edge, filamentous shape, rough and opaque surface, dusty texture          |
| <b>Cluster XXII</b>  |  | brown color, filamentous edge, rhizoidal shape, rough and opaque surface, dusty consistency        |
| <b>Cluster XXIII</b> |  | white color, filamentous edge, filamentous shape, rough and opaque surface, dusty texture          |

**Cluster  
XXIV**

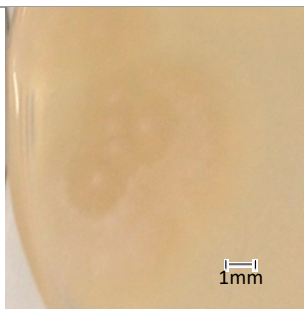

white color, filamentous edge,  
filamentous shape, rough and  
opaque surface, dusty texture

**Table S4.** Clustering of bacterial strains isolated from the canvas painting and their phylogenetic identification by 16S rRNA gene sequencing. Different subscript letters indicate the bacterial isolates for the same cluster. NI = not identified strain.

| Cluster | Sampling Point | Internal Code | Identities | Closest Taxonomic Relatives                                                 | Accession Number  | Query Coverage | Similarity |
|---------|----------------|---------------|------------|-----------------------------------------------------------------------------|-------------------|----------------|------------|
| I       | 2R             | Ia            | 587/607    | <i>Bacillus</i> sp.                                                         | NZ_CM000745.1     | 100%           | 96.71%     |
| I       | 3R             | Ib            | 1148/1198  | <i>Bacillus</i> sp.                                                         | MK_480129.1       | 98%            | 96%        |
| I       | 6R             | Ic            | 840/840    | <i>Bacillus subtilis</i> subsp. <i>Subtilis</i> str 168 (Kunst et al. 1997) | NC_000964.3       | 100%           | 100%       |
| I       | 21F            | Id            | 1000/1008  | <i>Bacillus thuringiensis</i> str. 97-27 (Han et al. 2006)                  | NC_005957.1       | 100%           | 99%        |
| II      | 7R             | Iia           | 843/908    | <i>Xanthomonadaceae</i>                                                     | NZ_CP018731.1     | 99%            | 93%        |
| III     | 7R             | IIIa          | 889/926    | <i>Streptomyces</i> sp.                                                     | NZ_DF968281.1     | 100%           | 96%        |
| IV      | 7R             | Iva           |            | NI                                                                          |                   |                |            |
| V       | 9F             | Va            |            | NI                                                                          |                   |                |            |
| V       | 10F            | Vb            |            | NI                                                                          |                   |                |            |
| VI      | 9F             | Via           | 450/481    | <i>Stenotrophomonas</i> sp.                                                 | NC_010943.1       | 75%            | 94%        |
| VII     | 11F            | VIIa          | 984/989    | <i>Pseudomonas psychrotolerans</i> str. PRS08-11306 (Hauser et al. 2004)    | NZ_CP018758.1     | 100%           | 99%        |
| VII     | 13F            | VIIb          |            | NI                                                                          |                   |                |            |
| VII     | 16F            | VIIc          | 848/878    | <i>Micrococcus luteus</i> NCTC 2665 (Young et al. 2010)                     | NC_012803.1       | 99%            | 97%        |
| VII     | 22F            | VIIId         | 305/312    | <i>Bacillus luteus</i> str. JC167 (Subhash et al. 2014)                     | NR_133701.1       | 98%            | 98%        |
| VII     | 24F            | VIIe          | 688/774    | <i>Caulobacteraceae</i>                                                     | NZ_CP022048.2     | 100%           | 89%        |
| VIII    | 12F            | VIIIa         | 936/1037   | <i>Xanthomonadaceae</i>                                                     | NC_010943.1       | 97%            | 91.15%     |
| IX      | 13F            | IXa           | 911/937    | <i>Cellulosimicrobium cellulans</i> str. PSBB019 (Metcalf and Brown 1957)   | NZ_CP021383.1     | 100%           | 97%        |
| X       | 14F            | Xa            | 788/848    | <i>Paenibacillaceae</i>                                                     | NZ_BCNM01000057.1 | 100%           | 93%        |
| X       | 20F            | Xb            | 815/877    | <i>Bacillaceae</i>                                                          | NC_000964.3       | 100%           | 93%        |
| XI      | 14F            | Xia           |            | NI                                                                          |                   |                |            |
| XII     | 16F            | XIIa          | 1051/1121  | <i>Paenibacillus</i> sp.                                                    | NZ_CP015286.1     | 93%            | 94%        |
| XIII    | 18F            | XIIa          | 986/1006   | <i>Bacillus simplex</i> sr. SH-B26 (Priest et al. 1988)                     | NZ_CP011009.1     | 99%            | 98%        |

**Table S5.** Clusterization of fungal strains isolated from the canvas painting and their phylogenetic identification by ITS gene sequencing. NI= not identified strain; NA= any author has been reported in NCBI database.

| Cluster | Sampling Point | Internal Code | Identifications | Closest Taxonomic Relatives                                                  | Accession Number | Query Coverage | Similarity |
|---------|----------------|---------------|-----------------|------------------------------------------------------------------------------|------------------|----------------|------------|
| I       | 3R             | Ia            | 536/536         | <i>Penicillium chrysogenum</i> str. GZU-BCECJXF2-2 (Thom, 1910)              | GU565149.1       | 99%            | 100%       |
| II      | 10F            | IIa           | 478/478         | <i>Penicillium corylophilum</i> isolate E20335 (Dierckx, 1901)               | MK267412.1       | 100%           | 100%       |
| II      | 13F            | IIb           | 514/514         | <i>Alternaria</i> sp. str.HXH9 [NA]                                          | MK880492.1       | 100%           | 100%       |
| II      | 5F             | IIc           |                 | NI                                                                           |                  |                |            |
| II      | 8F             | IId           |                 | NI                                                                           |                  |                |            |
| II      | 18F            | IIE           |                 | NI                                                                           |                  |                |            |
| III     | 8F             | IIIa          | 492/492         | <i>Penicillium chrysogenum</i> isolate AYMA5 (Thom, 1910)                    | MK643348.1       | 100%           | 100%       |
| III     | 13F            | IIIb          | 120/143         | <i>Trichocomaceae</i>                                                        | KM816770.1       | 37%            | 83.92%     |
| IV      | 9F             | IVa           | 516/516         | <i>Aspergillus</i> sp. isolate JJGG-73 (Tirab, 1908)                         | MK644120.1       | 100%           | 100%       |
| IV      | 9F             | IVb           | 506/507         | <i>Cephalotheca foveolata</i> isolate UTHSCSA DI 14-21 (Takashi et al. 2006) | KJ573100.1       | 100%           | 99.8%      |
| IV      | 10F            | IVc           |                 | NI                                                                           |                  |                |            |
| IV      | 12F            | IVd           | 569/571         | <i>Penicillium</i> sp. DQ25 [NA]                                             | FJ647576.1       | 100%           | 99%        |
| IV      | 11F            | IVe           | 512/512         | <i>Cephalotheca foveolata</i> isolate UTHSCSA DI 14-21 (Takashi et al. 2006) | KJ573100.1       | 100%           | 100%       |
| IV      | 14F            | IVf           | 427/427         | <i>Cephalotheca foveolata</i> isolate UTHSCSA DI 14-21 (Takashi et al. 2006) | KJ573100.1       | 100%           | 100%       |
| IV      | 12F            | IVg           | 480/484         | <i>Cladosporium halotolerans</i> DTO:308-B3 (Zalar et al. 2007)              | MF473102.1       | 100%           | 99.17%     |
| IV      | 14F            | IVh           | 285/306         | <i>Sordariaceae</i>                                                          | JX081244.1       | 61%            | 93.14%     |
| IV      | 16F            | IVi           | 517/518         | <i>Penicillium</i> sp.                                                       | MK817616.1       | 97%            | 99.81%     |
| IV      | 16F            | IVl           | 293/296         | <i>Penicillium chrysogenum</i> str. F-90 (Thom, 1910)                        | MF077260.1       | 100%           | 98.99%     |
| IV      | 16F            | IVm           | 520/520         | <i>Penicillium chrysogenum</i> str. PA2_4 (Thom, 1910)                       | KT200273.1       | 100%           | 100%       |
| IV      | 18F            | IVn           | 540/540         | <i>Cephalotheca foveolata</i> isolate UTHSCSA DI 14-21 (Takashi et al. 2006) | KJ573100.1       | 100%           | 100%       |
| IV      | 14F            | IVo           | 496/496         | <i>Penicillium chrysogenum</i> str. Fes1701 (Thom, 1910)                     | MK240330.1       | 100%           | 100%       |
| IV      | 16F            | IVp           | 519/520         | <i>Penicillium chrysogenum</i> isolate UWR_107 (Thom, 1910)                  | KY465761.1       | 100%           | 99.81%     |

|      |     |        |         |                                                                                    |            |        |        |
|------|-----|--------|---------|------------------------------------------------------------------------------------|------------|--------|--------|
| IV   | 19F | IVq    | 516/517 | <i>Cephalotheca foveolata</i> isolate<br>UTHSCSA DI 14-21 (Takashi et al.<br>2006) | KJ573100.1 | 99%    | 100%   |
| IV   | 19F | IVr    | 390/414 | <i>Cephalotheca foveolata</i> isolate<br>UTHSCSA DI 14-21 (Takashi et al.<br>2006) | KJ573100.1 | 99%    | 94.20% |
| IV   | 24F | IVs    | 482/484 | <i>Cephalotheca foveolata</i> isolate<br>UTHSCSA DI 14-21 (Takashi et al.<br>2006) | KJ573100.1 | 100%   | 99.59% |
| V    | 9F  | Va     | 528/528 | <i>Aspergillus</i> sp. isolate LN898693.1<br>[NA]                                  | MK605980.1 | 100%   | 99%    |
| V    | 25F | Vb     | 237/238 | Uncultured fungus                                                                  | JN847480.1 | 66%    | 99.58% |
| VI   | 9F  | VIa    | 538/539 | <i>Cephalotheca foveolata</i> isolate<br>UTHSCSA DI 14-21 (Takashi et al.<br>2006) | KJ573100.1 | 99.81% | 100%   |
| VII  | 9F  | VIIa   | 520/520 | <i>Cladosporium parahalotolerans</i> str.<br>NKM15 (Bensch and Samson,<br>2018)    | MK796044.1 | 100%   | 100%   |
| VIII | 5F  | VIIIa  |         | NI                                                                                 |            |        |        |
| IX   | 10F | IXa    | 432/444 | <i>Cephalotheca foveolata</i> str. UTHSC<br>08-2766 (Takashi et al. 2006)          | HE599376.1 | 99%    | 97.30% |
| IX   | 10F | IXb    | 507/513 | <i>Cephalotheca foveolata</i> isolate<br>UTHSCSA DI 14-21 (Takashi et al.<br>2006) | KJ573100.1 | 100%   | 99%    |
| IX   | 10F | IXc    | 542/545 | <i>Cephalotheca foveolata</i> isolate<br>UTHSCSA DI 14-21 (Takashi et al.<br>2006) | KJ573100.1 | 100%   | 99.63% |
| IX   | 10F | IXd    | 412/426 | <i>Cephalotheca</i> sp.                                                            | KJ573100.1 | 94%    | 97%    |
| IX   | 12F | IXe    | 543/545 | <i>Cephalotheca foveolata</i> isolate<br>UTHSCSA DI 14-21 (Takashi et al.<br>2006) | KJ573100.1 | 100%   | 99%    |
| IX   | 12F | IXf    |         | NI                                                                                 |            |        |        |
| IX   | 14F | IXg    | 168/176 | Uncultured fungus clone EMF39 V                                                    | JQ989325.1 | 34%    | 95.35% |
| X    | 10F | Xa     | 534/534 | <i>Aspergillus versicolor</i> str. CY11<br>(Tirab, 1908)                           | MH712291.1 | 99%    | 100%   |
| X    | 10F | Xb     | 537/537 | <i>Penicillium chrysogenum</i> str. F-53<br>(Thom, 1910)                           | MF077255.1 | 99%    | 100%   |
| XI   | 16F | XIa    |         | NI                                                                                 |            |        |        |
| XII  | 12F | XIIa   |         | NI                                                                                 |            |        |        |
| XIII | 12F | XIIIa  | 520/520 | <i>Penicillium chrysogenum</i> isolate CC<br>(Thom, 1910)                          | MK881028.1 | 100%   | 100%   |
| XIII | 17F | XIIIb  | 465/466 | <i>Penicillium</i> sp.                                                             | MK841453.1 | 100%   | 99.79% |
| XIII | 19F | XIIIc  | 552/552 | <i>Penicillium chrysogenum</i> isolate<br>E20335 (Thom, 1910)                      | MK267412.1 | 100%   | 100%   |
| XIII | 19F | XIII d | 539/539 | <i>Penicillium</i> sp. isolate SFR-12 [NA]                                         | MK817616.1 | 100%   | 100%   |

|       |     |        |         |                                                                        |            |      |        |
|-------|-----|--------|---------|------------------------------------------------------------------------|------------|------|--------|
| XIII  | 19F | XIIIe  | 412/414 | <i>Penicillium chrysogenum</i> str.<br>Fes1701 (Thom, 1910)            | MK240330.1 | 88%  | 99.52% |
| XIV   | 12F | XIVa   | 405/408 | <i>Trichocomaceae</i>                                                  | JN859854.1 | 100% | 92.26% |
| XV    | 13F | XVa    | 409/485 | <i>Chaetomiaceae</i>                                                   | JF817309.1 | 100% | 84.33% |
| XVI   | 14F | XVIa   | 395/395 | <i>Penicillium chrysogenum</i> str. Fes<br>1701 (Thom, 1910)           | MK240330.1 | 100% | 100%   |
| XVII  | 14F | XVIIa  | 414/417 | <i>Cephalotheca foveolata</i> (Takashi et<br>al. 2006)                 | KJ573100.1 | 100% | 99%    |
| XVII  | 14F | XVIIb  | 437/445 | <i>Penicillium chrysogenum</i> str. PA2_4<br>(Thom, 1910)              | KT200273.1 | 99%  | 98.42% |
| XVIII | 15F | XVIIIa |         | NI                                                                     |            |      |        |
| XIX   | 16F | XIXa   | 388/388 | <i>Phaeosphaeriaceae</i> sp. str. CBS<br>659.73 (Ahmed et al. 2016)    | KY090654.1 | 100% | 100%   |
| XX    | 17F | XXa    | 512/512 | <i>Penicillium</i> sp.<br><br>Str. K6 (Thom, 1910)                     | MK719928.1 | 100% | 100%   |
| XX    | 25F | XXb    |         | NI                                                                     |            |      |        |
| XXI   | 21F | XXIa   | 503/503 | <i>Cladosporium</i> sp. voucher VB2.1<br>[NA]                          | MH655007.1 | 100% | 100%   |
| XXI   | 17F | XXIb   |         | NI                                                                     |            |      |        |
| XXII  | 22F | XXIIa  | 538/538 | <i>Aspergillus insuetus</i> str. CBS 107.25<br>(Thom and Church, 1929) | MH854799.1 | 100% | 100%   |
| XXII  | 17F | XXIIb  |         | NI                                                                     |            |      |        |
| XXIII | 25F | XXIIIa | 284/288 | <i>Pichia occidentalis</i> (Kurtzman et al.<br>2008)                   | KY849376.1 | 97%% | 98.61% |
| XXIII | 19F | XXIIIb |         | NI                                                                     |            |      |        |
| XXIV  | 22F | XXIVa  |         | NI                                                                     |            |      |        |

**Figure S1.** Clusterization and relative abundance of bacterial (a) and fungal (b) isolates. For each cluster it is indicated, in brackets, the number of the isolated strains (n).

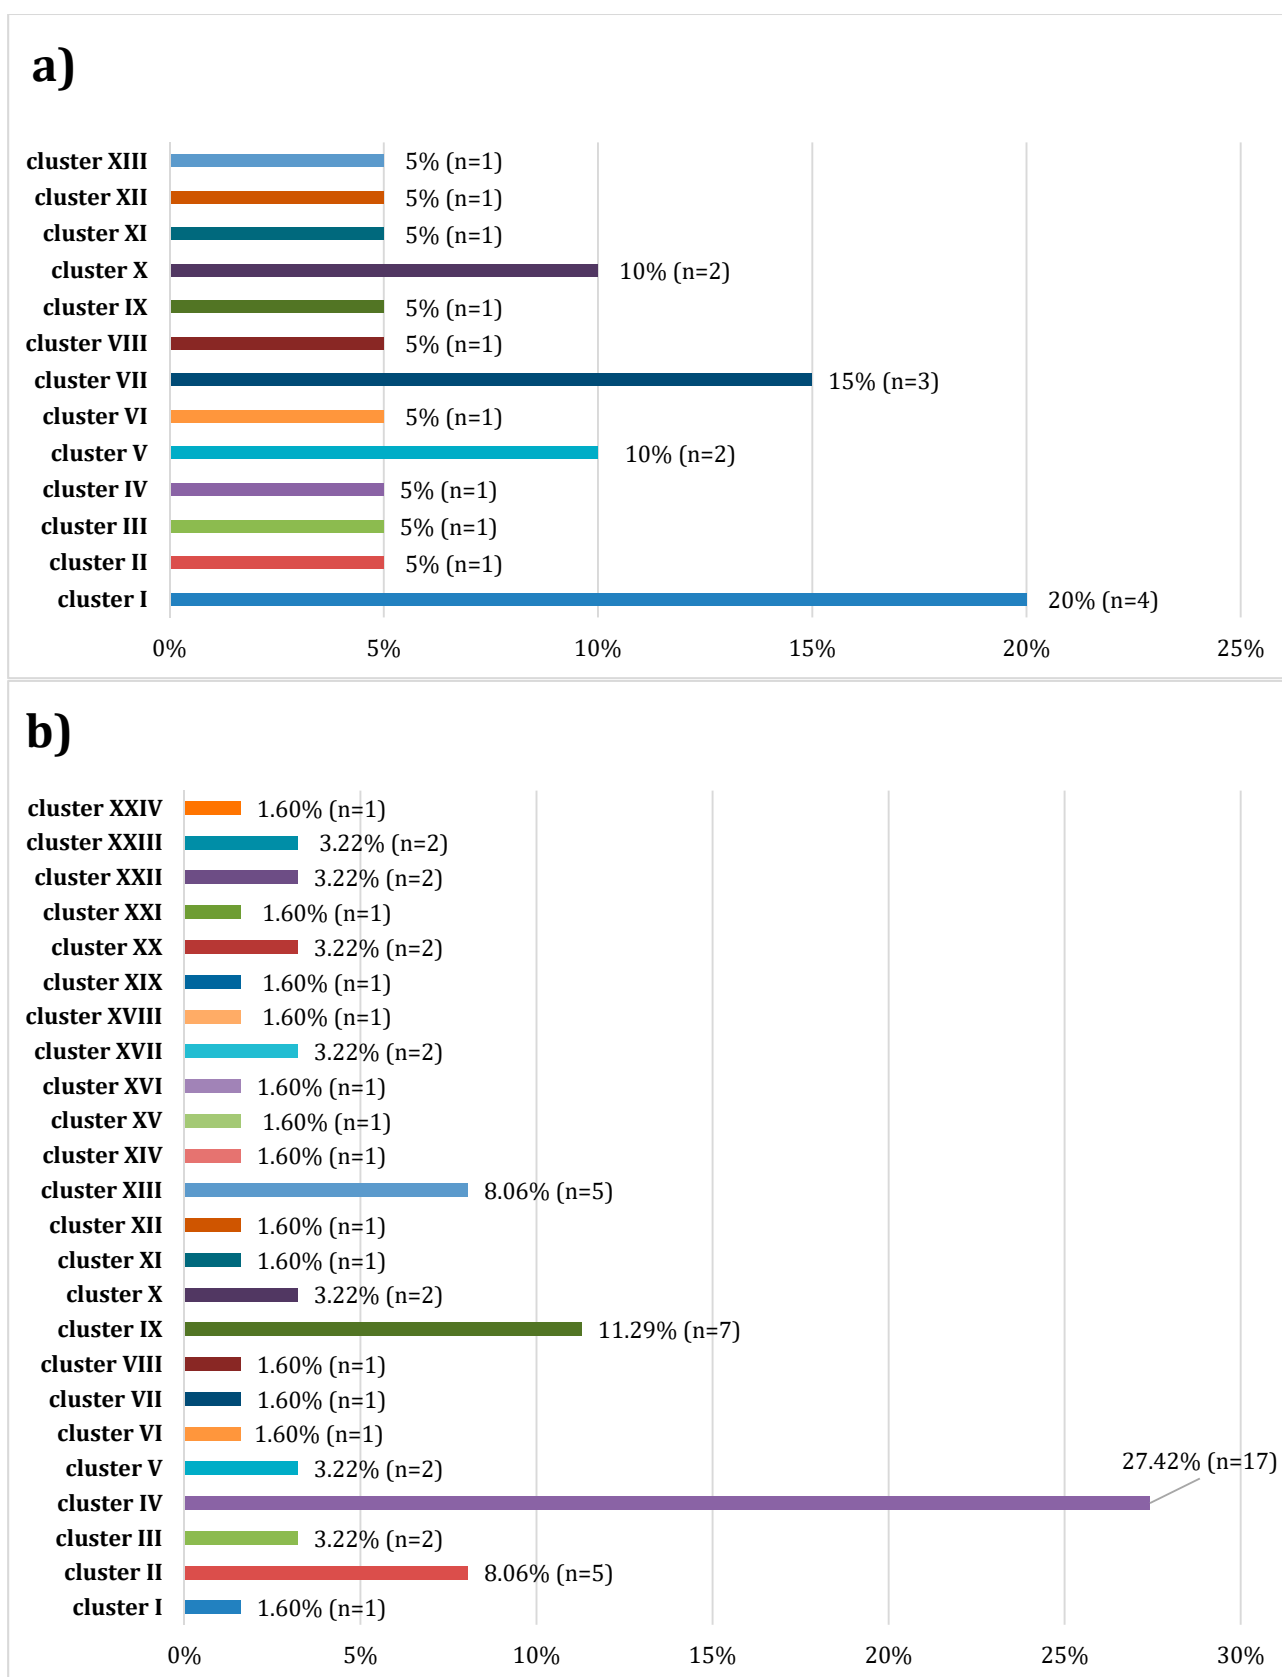

Supplement: s1 [file s1]
